1 **Preventing *S. aureus* biofilm formation on titanium surfaces by the release of antimicrobial**  
2  **$\beta$ -peptides from polyelectrolyte multilayers**

3  
4 **Angélica de L. Rodríguez López<sup>a</sup>, Myung-Ryul Lee<sup>b</sup>, Riley Whitehead<sup>b</sup>, David M. Lynn<sup>a,b,c</sup>,**  
5 **Sean P. Palecek<sup>a,b</sup>**

6  
7 *<sup>a</sup>Department of Materials Science and Engineering, 1509 University Avenue, <sup>b</sup>Department of*  
8 *Chemical and Biological Engineering, 1415 Engineering Drive, <sup>c</sup>Department of Chemistry, 1101*  
9 *University Avenue, University of Wisconsin- Madison, Madison, Wisconsin 53706, USA; Email:*  
10 *[dlynn@engr.wisc.edu](mailto:dlynn@engr.wisc.edu), [sppalecek@wisc.edu](mailto:sppalecek@wisc.edu)*

11  
12 Corresponding authors:

13 David M. Lynn Ph: (608) 262-1086 Fax: (608) 262-5434

14 Sean P. Palecek Ph: (608) 262 – 8931 Fax: (608) 262-5434.

15  
16

17 ABSTRACT

18 *Staphylococcus aureus* infections represent the major cause of titanium based-orthopaedic implant  
19 failure. Current treatments for *S. aureus* infections involve the systemic delivery of antibiotics and  
20 additional surgeries, increasing health-care costs and affecting patient's quality of life. As a step  
21 toward the development of new strategies that can prevent these infections, we build upon previous  
22 work demonstrating that the colonization of catheters by the fungal pathogen *Candida albicans*  
23 can be prevented by coating them with thin polymer multilayers composed of chitosan (CH) and  
24 hyaluronic acid (HA) designed to release a  $\beta$ -amino acid-based peptidomimetic of antimicrobial  
25 peptides (AMPs). We demonstrate here that this  $\beta$ -peptide is also potent against *S. aureus* (MIC =  
26 4  $\mu\text{g}/\text{mL}$ ) and characterize its selectivity toward *S. aureus* biofilms. We demonstrate further that  
27  $\beta$ -peptide-containing CH/HA thin-films can be fabricated on the surfaces of rough planar titanium  
28 substrates in ways that allow mammalian cell attachment and permit the long-term release of  $\beta$ -  
29 peptide.  $\beta$ -Peptide loading on CH/HA thin-films was then adjusted to achieve release of  $\beta$ -peptide  
30 quantities that selectively prevent *S. aureus* biofilms on titanium substrates *in vitro* for up to 24  
31 days and remained antimicrobial after being challenged sequentially five times with *S. aureus*  
32 inocula, while causing no significant MC3T3-E1 preosteoblast cytotoxicity compared to uncoated  
33 and film-coated controls lacking  $\beta$ -peptide. We conclude that these  $\beta$ -peptide-containing films  
34 offer a novel and promising localized delivery approach for preventing orthopaedic implant  
35 infections. The facile fabrication and loading of  $\beta$ -peptide-containing films reported here provides  
36 opportunities for coating other medical devices prone to biofilm-associated infections.

37  
38 KEYWORDS: Biofilms, Antimicrobial  $\beta$ -peptides, *S. aureus*, Polyelectrolyte multilayers,  
39 Titanium substrates

40  
41 STATEMENT OF SIGNIFICANCE:

42 Titanium (Ti) and its alloys are used widely in internal fixation devices due to their mechanical  
43 strength and long-term biocompatibility. However, these devices are susceptible to bacterial  
44 colonization and the subsequent formation of biofilms. Here we report a chitosan and hyaluronic  
45 acid polyelectrolyte multilayer-based approach for the localized delivery of helical, cationic,  
46 globally amphiphilic  $\beta$ -peptide mimetics of antimicrobial peptides to inhibit *S. aureus* colonization  
47 and biofilm formation. Our results reveal that controlled release of this  $\beta$ -peptide can selectively  
48 kill *S. aureus* cells without exhibiting toxicity toward MC3T3-E1 preosteoblast cells. Further  
49 development of this polymer-based coating could result in new strategies for preventing  
50 orthopaedic implant-related infections, improving outcomes of these titanium implants.

51  
52

## 53 1. Introduction

54 Internal fixation devices (IFDs) are used routinely for the fixation of bone fractures,  
55 replacement of arthritic joints, correction and stabilization of the spinal column, and other  
56 orthopaedic applications [1]. Titanium and titanium alloys are considered the gold-standard  
57 material for IFDs due to their high mechanical stability, low susceptibility to corrosion, inertness,  
58 biocompatibility and long-term functionality [1–4]. While the surface topography of titanium is  
59 beneficial in the context of promoting osseointegration of the implant, it also promotes microbial  
60 colonization [5]. Post-operative microbial infections can occur either within the first two months  
61 after implantation and/or many months to years post-surgery and are one of the most common  
62 complications following IFD implantation, with infection rates of 1-2.5% for primary knee and  
63 hip replacements and up to 20% after revision surgeries have been performed [4,6,7]. Post-  
64 operative infections have been linked to aseptic loosening, implant failure, and, in severe cases,  
65 morbidity or mortality [3,6,8–15].

66 *Staphylococci*, including *Staphylococcus aureus* (*S. aureus*), methicillin-resistant *S. aureus*  
67 (MRSA), and coagulase-negative *Staphylococci*, are the most common isolated microorganisms  
68 from infected IFDs due to their ability to adhere to IFD surfaces and subsequently form biofilms  
69 on implants [16,17]. These biofilms can then result in septic arthritis and osteomyelitis [3,7,12,18–  
70 20]. Current treatments for *S. aureus* IFD-associated infections consist of systemic delivery of  
71 antibiotics in combination with surgical site radical debridement and/or implant replacements;  
72 several revision surgeries are often needed [6,12,14,21,22]. Intravenous antibiotic treatment for  
73 the first 2-4 weeks, including rifampicin monotherapy and/or combination therapy with  
74 fluoroquinolones, clindamycin and  $\beta$ -lactams followed by an oral antibiotic regimen for an  
75 additional 4-6 weeks, remains the standard care for any antibiotic-sensitive *Staphylococcus*

76 infection [20,23]. For the treatment of MRSA infections, combination therapy including  
77 vancomycin, dicloxacillin, linezolid, daptomycin and fosfomycin antibiotics is often needed  
78 [16,24]. In addition to the severe side effects associated with the systemic delivery of antibiotics  
79 and the emergence of resistant *S. aureus* strains, antibiotic treatment for IFD-associated infections  
80 faces challenges such as poor antibiotic bioavailability in bone tissue and antibiotic resistance in  
81 bacterial biofilms [12,14,21,22]. In view of these challenges, there is a critical need for the  
82 development of new strategies preventing microbial infections associated with IFDs.

83 Antimicrobial peptides (AMPs) and peptidomimetic analogs of AMPs have been studied as  
84 potential new classes of antimicrobials. These AMPs are part of the host's adaptive immune system  
85 and often display selective toxicity to microbial cells vs. host cells [25,26]. Structural characteristics  
86 such as an overall net positive charge and adopting a global amphiphilic conformation (e.g.,  $\alpha$ -  
87 helix) upon contact with microbial surfaces confer antimicrobial activity [27,28]. The proposed  
88 toxicity mechanism of many types of AMPs involves disruption of the microbial cell membrane,  
89 leading to membrane permeabilization, cell lysis and subsequent death [25,29]. Given the lack of a  
90 single target of AMPs, the development of bacterial resistance to AMPs and their mimetics is  
91 thought to be less likely than for traditional antibiotics [26,30].

92 While AMPs hold promise as antimicrobials, their structural instability under physiologic  
93 conditions and susceptibility to protease degradation *in vivo* have limited their development as  
94 antimicrobials [31–34]. Recently,  $\beta$ -peptide foldamers have emerged as cationic, globally  
95 amphiphilic structurally stable peptidomimetics.  $\beta$ -Peptides have been demonstrated to have strong  
96 antibacterial activity against planktonic Gram-positive and Gram-negative bacteria [28,29,35–39].  
97 Motivated by the potential of  $\beta$ -peptides as an alternative antimicrobial treatment, we have  
98 previously demonstrated 14-helical  $\beta$ -peptide toxicity toward planktonic *Candida albicans* cells

99 and prevention of *C. albicans* biofilms *in vitro* [28,37,40,41]. Our previous work also identified the  
100 (ACHC- $\beta^3$ hVal- $\beta^3$ hLys)<sub>3</sub>  $\beta$ -peptide (Scheme 1) as a promising antimicrobial candidate due to its  
101 strong activity against planktonic *C. albicans* cells (MIC = 4  $\mu$ g/mL), ability to prevent *C. albicans*  
102 biofilm formation (MIC = 8  $\mu$ g/ml) and good selectivity to microbial cells ( $2.3 \pm 0.7\%$  hemolysis  
103 at planktonic MIC) [37,40]. Here we build upon our previous work to evaluate the ability of  
104 (ACHC- $\beta^3$ hVal- $\beta^3$ hLys)<sub>3</sub>  $\beta$ -peptide to inhibit the formation of *S. aureus* biofilms and selectivity  
105 to *S. aureus* vs. preosteoblast cells

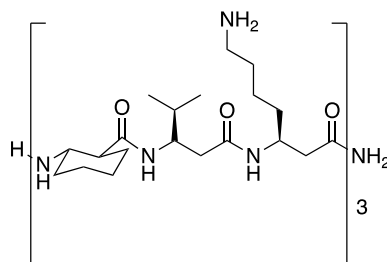

107 **Scheme 1:** Chemical structure of 14-helical (ACHC- $\beta^3$ hVal- $\beta^3$ hLys)<sub>3</sub>  $\beta$ -peptide used in this study.

108 In an effort to improve the selectivity of AMPs and AMP mimetics, increase activity against  
109 microbial cells and reduce the toxicity associated with a systemic delivery, strategies that can  
110 localize their delivery to sites prone to infection have recently emerged as an alternative treatment  
111 for IFD-related infections. Polyelectrolyte multilayer (PEM) coatings have been developed as a  
112 localized platform for surface-mediated release of active biological agents such as growth factors  
113 (e.g., BMP-2, bFGF),  $\beta$ -peptides, antibiotics, DNA, among other active agents [22,42–45]. We  
114 have also recently reported the prevention of *C. albicans* colonization and biofilm formation *in*  
115 *vitro* and *in vivo* on catheters coated with either polyglutamic acid / poly-L-lysine (PGA/PLL) or  
116 chitosan /hyaluronic acid (CH/HA) PEM films loaded with  $\beta$ -peptide [43,46,47]. Motivated by  
117 that past work, we focus here on demonstrating the potential use of  $\beta$ -peptide-containing PEM  
118 coatings fabricated on the surfaces of rough titanium substrate surfaces for preventing *S. aureus*-

119 related infections. We further evaluated the biocompatibility of these coatings with model  
120 osteogenic mammalian cells (MC3T3-E1 preosteoblast). Our results suggest that the controlled  
121 release of  $\beta$ -peptide quantities selective only to microbial cells can be achieved using minor  
122 modifications, such as chemical crosslinking and by tuning the  $\beta$ -peptide loading. Specifically, our  
123 results reveal that  $\beta$ -peptide-containing films deposited on titanium substrates surfaces can release  
124 sufficient quantities of  $\beta$ -peptide to prevent *S. aureus* biofilm formation *in vitro* for up to 24 days  
125 and five bacterial challenges. Overall, the results reported here indicate  $\beta$ -peptide-containing PEMs  
126 coatings to be a useful platform for the design of antibacterial coated IFDs for inhibiting *S. aureus*  
127 biofilm formation.

128

## 129 **2. Materials and Methods**

### 130 *2.1. Materials*

131 Branched polyethyleneimine (BPEI, MW=25,000), chitosan (CH, medium molecular weight),  
132 phosphate-buffered saline (PBS), paraformaldehyde, glutaraldehyde, menadione, filtered water for  
133 cell culture, fluorescein-labeled hyaluronic acid, chloramphenicol, and medical grade titanium  
134 disks were purchased from Sigma-Aldrich. Sodium hyaluronate (HA, MW 1,500,000-2,200,000)  
135 was purchased from Acros Organic. 2,3-Bis-(2-methoxy-4-nitro-5-sulfophenyl)-2H-tetrazolium-  
136 5-carboxanilide (XTT), RPMI 1640 powder containing L-glutamine and phenol red (without  
137 HEPES or Na bicarbonate), penicillin-streptomycin (10,000 U/mL), NaCl, 3-(N-  
138 morpholino)propanesulfonic acid (MOPS), 1-ethyl-3-(3-dimethylaminopropyl)carbodiimide  
139 hydrochloride (EDC), N-hydroxysulfosuccinimide (Sulfo-NHS), Calcein-AM, ethidium  
140 homodimer-1, Hoechst 33342, Nunc™ Lab-Tek™ II Chamber Slide™ System, and Pierce™  
141 Quantitative Fluorometric Peptide Assay were purchased from Thermo Fisher Scientific.  $\alpha$ -MEM

142 (1x) minus ascorbic acid was obtained from Gibco. Osmium tetroxide (4%) was obtained from  
143 Electron Microscopy Sciences. Accutase was purchased from Innovative Cell Technologies. Cell  
144 Titer Glo 2.0 assay kits were obtained from Promega. All materials were used as received.

## 145 2.2. General Considerations

146  $\beta$ -Peptide (ACHC- $\beta^3$ hVal- $\beta^3$ hLys)<sub>3</sub> was synthesized using previously reported methods [37].  
147 Titanium substrates were cut to 0.6 cm width x 1.8 cm length dimensions, cleaned with acetone,  
148 ethanol, methanol, and deionized water, dried under a stream of filtered and compressed air, and  
149 plasma etched for 1800s (Plasma Etch, Carson City, NV) prior to the fabrication of PEM films.  
150 Uncoated, film-coated and  $\beta$ -peptide-loaded titanium substrates were UV sterilized for 15 min per  
151 side using a biosafety cabinet prior to biological experiments. Fluorescence microscopy images  
152 were obtained with an Olympus IX70 epifluorescence microscope using Nikon NIS image  
153 acquisition software. Fiji Image J was used to create merged images and quantify fluorescence  
154 intensities. Critical point drying, sputtering and scanning electron microscopy (SEM) were  
155 performed using a Leica EM CPD 300 critical point dryer, Leica ACE600 Sputter, and a LEO  
156 SEM microscope at 5kV. Fluorescence measurements to characterize  $\beta$ -peptide release,  
157 absorbance measurements to quantify *S. aureus* cell viability, and luminescence measurements to  
158 quantify MC3T3-E1 cell viability were taken with a Tecan M200 multi-well plate reader.

## 159 2.3. Characterization of $\beta$ -peptide antimicrobial minimum inhibitory concentration (MIC) and 160 MC3T3-E1 preosteoblast cell cytotoxicity

161 The antimicrobial activity of (ACHC- $\beta^3$ hVal- $\beta^3$ hLys)<sub>3</sub>  $\beta$ -peptide against *S. aureus* biofilms was  
162 assayed in 96-well plates according to susceptibility testing guidelines provided by the Clinical  
163 and Laboratory Standards Institute [48]. The broth microdilution assay methods were modified to  
164 include the quantitative assessment of cell viability using XTT. An aliquot of 100  $\mu$ L of two-fold

165 serial dilutions of  $\beta$ -peptide in MH medium + 0.5% glucose was mixed with 100  $\mu$ L of *S. aureus*  
166 (grown in TSB medium overnight at 37°C and concentration adjusted to 10<sup>6</sup> CFU/mL) cell  
167 suspension and the plates were incubated for 24 hr at 37°C to allow biofilm formation. Wells  
168 lacking  $\beta$ -peptide and wells lacking cells and  $\beta$ -peptide were included as controls. After 24 hr,  
169 100  $\mu$ L of XTT solution (0.5 g/L in PBS, pH 7.4, containing 3  $\mu$ M menadione in acetone) was  
170 added to all wells, and plates were incubated at 37°C in the dark for 1 hr. The supernatants (75  $\mu$ L)  
171 were transferred to a new 96-well plate and absorbance at 490 nm was recorded. The cell viability  
172 was normalized to the untreated control and plotted as a function of  $\beta$ -peptide concentration. The  
173 lowest assayed concentration of  $\beta$ -peptide that resulted in a decrease in absorbance of at least 90%  
174 of the mean was determined to be the minimum inhibitory concentration (MIC) of the peptide.

175 MC3T3-E1 cell toxicity was assessed using the Cell Titer Glo protocol to quantify the  
176 amount of ATP present in metabolically active cells. MC3T3-E1 cells were cultured in MEM $\alpha$   
177 medium supplemented with 10% FBS, 1% of penicillin-streptomycin, in a humidified incubator at  
178 37°C and 5% CO<sub>2</sub> in air. Upon reaching 100% confluency, cells were detached using Accutase,  
179 centrifuged and resuspended in MEM $\alpha$  medium to a final concentration of 5x10<sup>4</sup> cells/cm<sup>2</sup>. An  
180 aliquot of 100  $\mu$ L of two-fold serial dilutions of  $\beta$ -peptide in MEM $\alpha$  medium was mixed with 100  
181  $\mu$ L of the MC3T3- E1 cell suspension and the plates were incubated for 24 hr at 37°C and 5% CO<sub>2</sub>  
182 in air. Wells lacking  $\beta$ -peptide and wells lacking cells and  $\beta$ -peptide were included as controls.  
183 Afterwards, Cell Titer Glo reagent (100  $\mu$ L) was added into each well, incubated for 5 min, and  
184 the luminescence signal was recorded. The percent of cell death in each well was calculated as:

185 
$$\% \text{ cell death} = \frac{\text{RLU}_{\text{control}} - \text{RLU}_{\text{peptide}}}{\text{RLU}_{\text{control}}} \times 100$$



186 where  $RLU_{\text{control}}$  represents the luminescence signal of untreated control (well lacking  $\beta$ -peptide)  
187 and  $RLU_{\text{peptide}}$  represents the luminescence signal of  $\beta$ -peptide-containing samples. The percent of  
188 cell death was plotted as a function of  $\beta$ -peptide concentration to generate the dose-response curve  
189 for MC3T3-E1 toxicity. The  $IC_{20}$  value was determined as the  $\beta$ -peptide concentration that resulted  
190 in 20% death of MC3T3-E1 cells.

#### 191 *2.4. Fabrication of polyelectrolyte multilayers films on the surfaces of titanium substrates*

192 Solutions of HA and BPEI (1 mg/mL) were prepared in deionized water containing 0.15 M NaCl.  
193 CH solution (1 mg/mL) was prepared in 0.1 M acetic acid and deionized water containing 0.15 M  
194 NaCl. PEMs were fabricated on the surfaces of cut, cleaned, and plasma etched titanium substrates  
195 using the following general protocol: (1) substrates were submerged in the 1 mg/mL BPEI solution  
196 for 30 min, (2) substrates were removed and immersed in a rinse bath of deionized water containing  
197 0.15 M NaCl for 1 min, followed by a second rinse bath for 1 min, (3) substrates were immersed  
198 in the 1 mg/mL CH solution for 5 min, (4) substrates were removed and rinsed as described in step  
199 2, (5) substrates were immersed in the 1 mg/mL HA solution for 5 min, (6) substrates were  
200 removed and rinsed as described in step 2 and steps 3-6 were repeated until a total of 19.5 bilayers  
201 were deposited. For experiments designed to characterize film growth profiles, PEMs were  
202 fabricated as described above but using fluorescein-labeled hyaluronic acid. Fluorescence images  
203 from 3 different regions of the PEM-coated titanium substrate were taken after 4.5, 9.5, 14.5 and  
204 19.5 bilayers were deposited. The fluorescence intensities of these images were quantified using  
205 Fiji Image J software.

#### 206 *2.5. Chemical crosslinking of PEM films deposited on titanium substrates*

207 CH/HA PEMs films were chemically crosslinked by immersing PEM-coated titanium substrates  
208 in a 400 mM EDC/100 mM Sulfo-NHS solution in deionized water containing 0.15 M NaCl for

209 16 hr at room temperature. Next, substrates were rinsed 3 times for 30 min each in fresh deionized  
210 water containing 0.15 M NaCl, followed by a drying using filtered and compressed air. An  
211 uncoated control titanium substrate was immersed in deionized water containing 0.15 M NaCl  
212 without crosslinking agents for 16 hrs as control. For epifluorescence microscopy to characterize  
213 the films before and after crosslinking, CH/HA films were fabricated using fluorescein-labeled  
214 HA and fluorescence images were taken before and after crosslinking.

#### 215 2.6. *Characterization of crosslinked films using PM-IRRAS*

216 To characterize CH/HA PEM film crosslinking, CH/HA PEMs films were deposited on gold-  
217 coated silicon substrates and crosslinked as described above. Crosslinking was characterized by  
218 polarization-modulation infrared reflectance-absorbance spectroscopy (PM-IRRAS) conducted in  
219 a similar fashion to previously reported methods [49]. Briefly, gold-coated silicon substrates  
220 coated with CH/HA PEM films before and after crosslinking were placed in a Nicolet Magna-IR  
221 860 Fourier transform infrared spectrophotometer equipped with a photoelastic modulator (PEM-  
222 90, Hinds Instruments, Hillsboro, OR), a synchronous sampling demodulator (SSD-100, GWC  
223 Technologies, Madison WI), and a liquid nitrogen cooled mercury-cadmium-telluride detector.  
224 The modulation was set at 5865.0 nm, 0.5 retardation and 500 scans with a resolution of 2 cm<sup>-1</sup>  
225 were obtained for each sample. The differential reflectance infrared spectra were normalized and  
226 converted to absorbance spectra using a previously reported procedure [49].

#### 227 2.7. *PEM loading with $\beta$ peptide*

228 Titanium substrates coated with crosslinked CH/HA PEMs were immersed in a 0.44 mg/mL  
229 solution (or an otherwise desired concentration) of  $\beta$ -peptide (ACHC- $\beta^3$ hVal- $\beta^3$ hLys)<sub>3</sub> in  
230 deionized water containing 0.15 M NaCl for a period of 24 hr at room temperature.  $\beta$ -Peptide  
231 loaded substrates were removed from solution and dried under a stream of filtered and compressed

232 air. An uncoated control titanium substrate was immersed in deionized water containing 0.15 M  
233 NaCl without  $\beta$ -peptide for 24 hrs. Similarly, a PEM film-coated control was immersed in in  
234 deionized water containing 0.15 M NaCl without  $\beta$ -peptide for 24 hr.

#### 235 *2.8. Estimation of film thickness*

236 The thicknesses of CH/HA, crosslinked CH/HA, and  $\beta$ -peptide-loaded CH/HA films on titanium  
237 substrates were estimated using focused ion beam scanning electron microscopy (FIB-SEM).  $\beta$ -  
238 Peptide loaded CH/HA films were prepared as described before. Uncrosslinked CH/HA films were  
239 incubated for a total of 30 hrs in deionized water containing 0.15 M NaCl as a control lacking  
240 crosslinking solution and  $\beta$ -peptide. Similarly, control crosslinked CH/HA films were incubated  
241 in deionized water containing 0.15 M NaCl and lacking  $\beta$ -peptide for 24hrs. Samples were  
242 platinum-palladium coated and 1 rectangular section 10  $\mu$ m wide was milled using a 0.10 nA  
243 electrical current to create a film cross-section. Five different regions within the milled section  
244 were selected to estimate the film thickness using SEM at 2kV.

#### 245 *2.9. Characterization $\beta$ -peptide release from PEM films*

246 Characterization of  $\beta$ -peptide release from PEMs on titanium substrates was performed by  
247 following the manufacturer's specifications for the Pierce™ Quantitative Fluorometric Peptide  
248 Assay kit. Briefly, uncoated, film-coated, and  $\beta$ -peptide loaded titanium substrates were immersed  
249 in 750  $\mu$ L of filtered water and incubated at 37°C. At predetermined intervals, titanium substrates  
250 were removed from the incubator and  $\beta$ -peptide concentration in the release solution was  
251 quantified. 10  $\mu$ L of the release solution was mixed with 70  $\mu$ L of peptide assay buffer and 20  $\mu$ L  
252 of peptide assay reagent and incubated for 5 min. Fluorescence intensity was recorded at 390 nm  
253 excitation and 475 nm emission. Fluorescence measurements were converted to  $\beta$ -peptide  
254 concentrations using a calibration curve constructed with known  $\beta$ -peptide concentrations. After

255 each measurement, titanium substrates were immersed in 750  $\mu$ L of fresh filtered water and  
256 returned to the incubator. The plot shown in Figure 4 was constructed by cumulatively adding the  
257 concentrations of  $\beta$ -peptide released at each timepoint and is normalized to the titanium substrate  
258 surface area.

#### 259 2.10. Characterization of the antibacterial activity of $\beta$ -peptide-loaded PEM films

260 *S. aureus* ATCC 3359 and AH17456 cells were grown overnight at 37°C in liquid TSB,  
261 subcultured the following day, and grown to an optical density at 600 nm (OD<sub>600</sub>) of 0.4. TSB  
262 growth medium for the GFP-expressing AH1756 strain was supplemented with 10  $\mu$ g/mL  
263 chloramphenicol for plasmid maintenance purposes. Cells were washed with PBS and resuspended  
264 in MH medium supplemented with 0.5% glucose to a cell density of 10<sup>6</sup> CFU/mL to stimulate  
265 biofilm growth. Uncoated, film-coated, and  $\beta$ -peptide loaded substrates were placed inside a four-  
266 well Lab Tek chamber containing 750  $\mu$ L of *S. aureus* cell suspension in supplemented MH  
267 medium and incubated for 24 hr at 37°C to allow biofilm growth. Growth of biofilms was  
268 characterized using (i) an XTT metabolic activity assay and (ii) by imaging the biofilms using  
269 fluorescence microscopy and SEM.

270 For the XTT metabolic activity assay, each titanium substrate was removed from the four-well  
271 Lab Tek chamber, gently washed with PBS and transferred into a new and unused Lab Tek  
272 chamber. XTT solution (750  $\mu$ L; 0.5 g/L in PBS, supplemented with 3  $\mu$ M menadione in acetone)  
273 was added to each well of the Lab Tek Chamber containing the uncoated, film-coated and  $\beta$ -  
274 peptide loaded titanium substrates. After incubating the XTT solution at 37°C for 1.5 hr in the  
275 dark, 75  $\mu$ L of the supernatant was transferred into a 96-well plate and the absorbance of the  
276 solution at 490 nm was measured to determine the relative metabolic activity of the biofilms. Data

277 were plotted relative to the absorbance value from the well containing the uncoated titanium  
278 substrate control.

279 A biological and XTT metabolic activity assay configuration similar to that described above  
280 was used to evaluate biofilm formation after multiple *S. aureus* challenge experiments and after  
281 incubation of substrates in PBS prior to biofilm formation. For the multiple challenge experiments,  
282 uncoated, film-coated, and  $\beta$ -peptide loaded titanium substrates were initially incubated with an *S.*  
283 *aureus* inoculum and biofilms were allowed to grow for 24 hr (challenge 1). Substrates were then  
284 incubated in PBS for an additional 2 days and subsequently challenged with an additional *S. aureus*  
285 inoculum for 24 hr (challenge 2). This multiple-challenge process was repeated until 5 different *S.*  
286 *aureus* challenges were achieved, for a total of 18 days. Different sets of titanium substrates were  
287 sacrificed after 1, 2, 3, 4, and 5 challenges and XTT metabolic assays were performed to quantify  
288 biofilm formation. For the PBS pre-incubation experiments, uncoated, film-coated, and  $\beta$ -peptide  
289 loaded titanium substrates were incubated in PBS at 37°C for the specified period of time (e.g., 1,  
290 2, 4, 6, 12, 24, 36, 48, and 60 days) and then challenged with an *S. aureus* inoculum. Extents of  
291 biofilm formation were quantified via XTT assay and data were normalized to the uncoated  
292 control.

293 To analyze biofilm formation using fluorescence microscopy, a GFP-expressing *S. aureus*  
294 strain AH1756 was used. Following 24 hr biofilm formation at 37°C, uncoated, film-coated, and  
295  $\beta$ -peptide loaded titanium substrates were washed with PBS and biofilm growth was inspected  
296 under an epifluorescence microscope. We also evaluated *S. aureus* biofilm morphology using  
297 SEM. For this analysis, uncoated, film-coated, and  $\beta$ -peptide loaded titanium substrates were  
298 prepared using a previously published protocol [43,46]. Briefly, titanium substrates were placed  
299 in a fixative solution (1% (v/v) glutaraldehyde and 4% (v/v) paraformaldehyde) overnight at 4 °C.

300 Next, titanium substrates were rinsed with PBS for 10 min and placed in osmium tetroxide (1%)  
301 for 30 min, followed by another wash in PBS for 10 min. Titanium substrates were then dehydrated  
302 using a series of ethanol washes (30%, 50%, 70%, 85%, 95% and 100%, 10 min each) and final  
303 desiccation was performed using critical point drying. Finally, specimens were mounted in  
304 aluminum stubs and sputter-coated with a 12  $\mu\text{m}$  thick layer of platinum-palladium. Samples were  
305 then imaged by SEM in high-vacuum mode at 5kV.

### 306 2.11. *Biocompatibility of $\beta$ -peptide-loaded PEM films*

307 MC3T3-E1 cells were grown in MEM $\alpha$  medium, supplemented with 10% FBS and 1% penicillin-  
308 streptomycin, in a humidified incubator at 37°C and 5% CO<sub>2</sub> in air. Culture medium was  
309 replenished every 2-3 days and cells were sub-cultured using Accutase when near-100%  
310 confluency was observed. All cells used in these studies were less than passage number 25.  
311 Uncoated, film-coated, and  $\beta$ -peptide loaded titanium substrates were placed inside four-well Lab  
312 Tek chambers containing 750  $\mu\text{L}$  of an MC3T3-E1 cell suspension adjusted to a cell density of  
313  $5 \times 10^4$  cells/cm<sup>2</sup> in  $\alpha$ -MEM and incubated for 24 hr at 37°C and 5% CO<sub>2</sub>, unless otherwise  
314 specified. MC3T3-E1 cell viability was characterized using (i) a Cell Titer Glo metabolic activity  
315 assay and (ii) by visualizing MC3T3-E1 cell attachment with fluorescence microscopy.

316 Cell Titer Glo assessment of MC3T3-E1 cell metabolic activity was performed according to  
317 the manufacturer's recommendations. Briefly, uncoated, film-coated, and  $\beta$ -peptide loaded  
318 titanium substrates were removed from the four-well Lab Tek chambers, gently washed with PBS  
319 and transferred into a new and unused Lab Tek chamber. MEM $\alpha$  medium and Cell Titer Glo  
320 reagent (750  $\mu\text{L}$  each) were added into the wells and incubated for 5 min. Next, 180  $\mu\text{L}$  of  
321 supernatant was transferred into a 96-well plate and luminescence signal was quantified.  
322 Background luminescence from wells containing medium and Cell Titer Glo was subtracted from

323 all readings and data were normalized relative to the uncoated titanium control. For the PBS pre-  
324 incubation experiments, uncoated, film-coated, and  $\beta$ -peptide-loaded titanium substrates were  
325 allowed to elute  $\beta$ -peptide in PBS at 37°C for the specified period of time (e.g. 1, 2, 4, 6, 12, 24,  
326 36, 48 and 60 days). MC3T3-E1 cells were then seeded on the films and allowed to attach and  
327 grow for 24 hr. Viability of the MC3T3-E1 cells was then quantified using the Cell Titer Glo assay.

328 Fluorescence microscopy images of MC3T3-E1 cells on the surfaces of uncoated, film-coated,  
329 and  $\beta$ -peptide-loaded titanium substrates were acquired as previously described [22]. Briefly, each  
330 titanium substrate was placed inside a four-well Lab Tek chamber containing 750  $\mu$ L of a MC3T3-  
331 E1 cell suspension adjusted to a cell density of  $5 \times 10^4$  cells/cm<sup>2</sup> in MEM $\alpha$  medium and incubated  
332 for the specified period of time (e.g. 2, 4, and 6 days) at 37°C and 5% CO<sub>2</sub>. Afterwards, a working  
333 solution of 2  $\mu$ M Calcein-AM, 4  $\mu$ M ethidium homodimer-1 and 0.2 mg/mL Hoechst 33342 was  
334 prepared in PBS and then incubated with the cells on Ti substrates for 30 min at 37°C. The dye  
335 solution was gently aspirated from the wells, and then substrates were rinsed with PBS and imaged  
336 using an epifluorescence microscope.

### 337 2.12. Statistical analysis

338 GraphPad Prism 7.0 (GraphPad Software, Inc) was used for all statistical analysis. For pairwise  
339 comparisons a Student's T-test was performed. Statistical comparisons were performed using two-  
340 way analysis of variance (ANOVA) or one-way ANOVA as appropriate, with Tukey's Honest  
341 Significant Difference post-hoc analysis for multiple testing over all comparisons. Figure legends  
342 describe the statistical tests used for each particular data set. Statistical significance was accepted  
343 at a p value of less than 0.05. Data are represented as mean values  $\pm$  standard deviations (SD) for  
344 three separate biological replicates, with three technical replicates in each biological replicate.

345

### 346 3. Results and Discussion

#### 347 3.1. $\beta$ -peptide inhibits *S. aureus* biofilm formation

348 The ability of *S. aureus* cells to attach and form drug-resistant biofilms on the surfaces of IFDs  
349 poses a challenge for the treatment of implant-related bacterial infections. Motivated by previous  
350 studies demonstrating the antibacterial activity of cationic 14-helical  $\beta$ -peptides, with MICs  
351 against planktonic *S. aureus* cells ranging from 3.1 to 200  $\mu\text{g}/\text{mL}$  [29,35,50], and previous work  
352 demonstrating (ACHC- $\beta^3\text{hVal}$ - $\beta^3\text{hLys}$ )<sub>3</sub>  $\beta$ -peptide activity and selectivity against *C. albicans*  
353 cells vs. human red blood cells [37,40], we tested the potential of the (ACHC- $\beta^3\text{hVal}$ - $\beta^3\text{hLys}$ )<sub>3</sub>  $\beta$ -  
354 peptide to prevent the formation of *S. aureus* biofilms. We quantified the MIC for preventing *S.*  
355 *aureus* biofilms in 96-well polystyrene plates, following the CLSI antimicrobial susceptibility  
356 standards [48], with modifications to include biofilm growth (e.g. 37°C, MH medium  
357 supplemented with 0.5% glucose and 24 hr incubation time). Results shown in Figure 1 (orange  
358 squares) show that (ACHC- $\beta^3\text{hVal}$ - $\beta^3\text{hLys}$ )<sub>3</sub>  $\beta$ -peptide has a biofilm inhibition MIC of 4  $\mu\text{g}/\text{mL}$ .  
359 Although strong antimicrobial activity is highly desired, evaluating selectivity to *S. aureus* cells  
360 exclusively is also crucial for potential use to prevent IFD-related infections *in vivo*. We therefore,  
361 investigated (ACHC- $\beta^3\text{hVal}$ - $\beta^3\text{hLys}$ )<sub>3</sub>  $\beta$ -peptide biocompatibility with MC3T3-E1 preosteoblast  
362 subclone 4 cells, a model mammalian cell line with osteoblast differentiation capacity and  
363 mineralization activity. Our results showed a concentration-dependent  $\beta$ -peptide toxicity toward  
364 MC3T3-E1 preosteoblast cells with an inhibitory concentration resulting in 20% cell death (IC<sub>20</sub>)  
365 of  $22.6 \pm 7.4$   $\mu\text{g}/\text{mL}$  (Figure 1, blue circles). We defined an *in vitro* selectivity index (SI) as the  
366 ratio of  $\beta$ -peptide cytotoxicity (IC<sub>20</sub>) against MC3T3-E1 cells to MIC against inhibiting *S. aureus*  
367 biofilm formation (SI= IC<sub>20</sub>/MIC). Using this approach, (ACHC- $\beta^3\text{hVal}$ - $\beta^3\text{hLys}$ )<sub>3</sub>  $\beta$ -peptide was  
368 demonstrated to have a SI value of 5.7, suggesting good selectivity for *S. aureus* vs. MC3T3-E1



369 cells. This result motivated the development of delivery strategies for its localized release for  
370 preventing *S. aureus* biofilm formation.

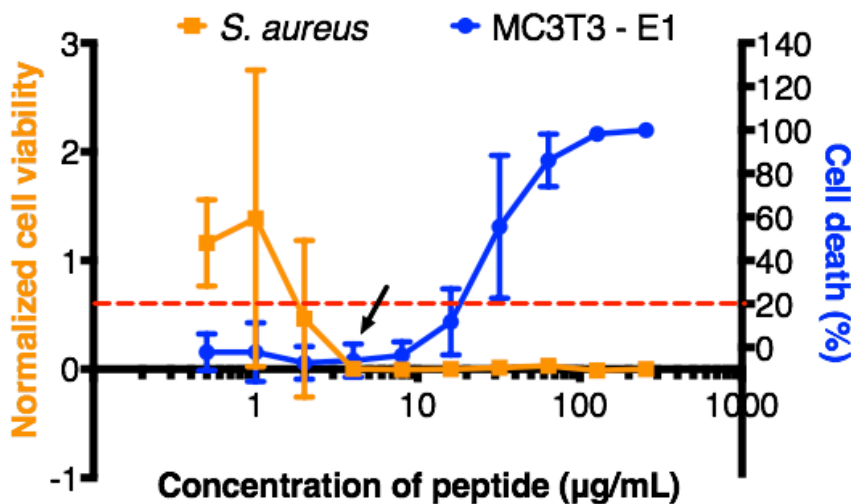

**Figure 1:** Effect of  $\beta$ -peptide concentration on inhibition of *S. aureus* biofilms and toxicity toward MC3T3-E1 cells. *S. aureus* cells ( $10^6$  cells/mL) were incubated with the indicated  $\beta$ -peptide concentrations in MH medium + 0.5% glucose in 96-well plates for 24 hr at 37°C, and then biofilm was quantified using an XTT assay. Biofilm viability was normalized to a control lacking  $\beta$ -peptide. The arrow indicates the MIC for inhibiting *S. aureus* biofilm formation. To evaluate  $\beta$ -peptide cytotoxicity, we incubated MC3T3-E1 cells ( $5 \times 10^4$  cells/cm<sup>2</sup>) with the indicated  $\beta$ -peptide concentrations in MEM  $\alpha$  medium in 96-well plates for 24 hr at 37°C and 5% CO<sub>2</sub>. MC3T3-E1 cell viability was quantified using a Cell Titer Glo assay. Cell death was calculated based on the percent change with respect to the cells grown in the absence of peptide. The dashed red line indicates the IC<sub>20</sub>  $\beta$ -peptide concentration. Data points represent the mean values and error bars the standard deviation of three independent experiments.

371

### 372 3.2. Fabrication and characterization of $\beta$ -peptide-containing PEM films

373 We selected the polysaccharide-based CH/HA PEM film system for use in this study because  
374 these coatings have been well-studied as a platform for the localized release of active agents from  
375 antimicrobial coatings and tissue-integrating scaffolds [43,51–55]. Additionally we have recently  
376 demonstrated antifungal activity of CH/HA PEMs containing  $\beta$ -peptide [43,47]. That study showed  
377 that CH/HA PEM films containing (ACHC- $\beta^3\text{hVal}$ - $\beta^3\text{hLys}$ )<sub>3</sub> fabricated in the lumens of catheter

378 segments using an iterative flow-based approach prevented *C. albicans* biofilms *in vitro* and *in*  
379 *vivo*. This current study sought to extend upon that prior work to (i) determine whether CH/HA  
380 PEMs fabricated on rough and planar titanium substrates could be used to promote the long-term  
381 release of  $\beta$ -peptide and prevent formation of *S. aureus*-related biofilms, (ii) evaluate the  
382 biocompatibility of  $\beta$ -peptide-loaded PEM films with the MC3T3-E1 preosteoblast cell line, and  
383 (iii) assess the selectivity of these  $\beta$ -peptide-containing coatings against *S. aureus* vs. MC3T3-E1  
384 cells.

385 Using an iterative immersion-based layer-by-layer assembly approach, we deposited CH/HA  
386 multilayers on the surfaces of titanium substrates (Figure 2) and characterized their growth by  
387 monitoring the fluorescence intensity of FITC-labeled HA incorporated within the films, using a  
388 previously published approach consisting of imaging and analyzing the fluorescence intensity after  
389 the deposition of every five CH/HA bilayers [46]. As shown in Figure 2, the average fluorescence  
390 intensity increased with the number of CH/HA bilayers deposited, consistent with layer-by-layer  
391 film growth [56].

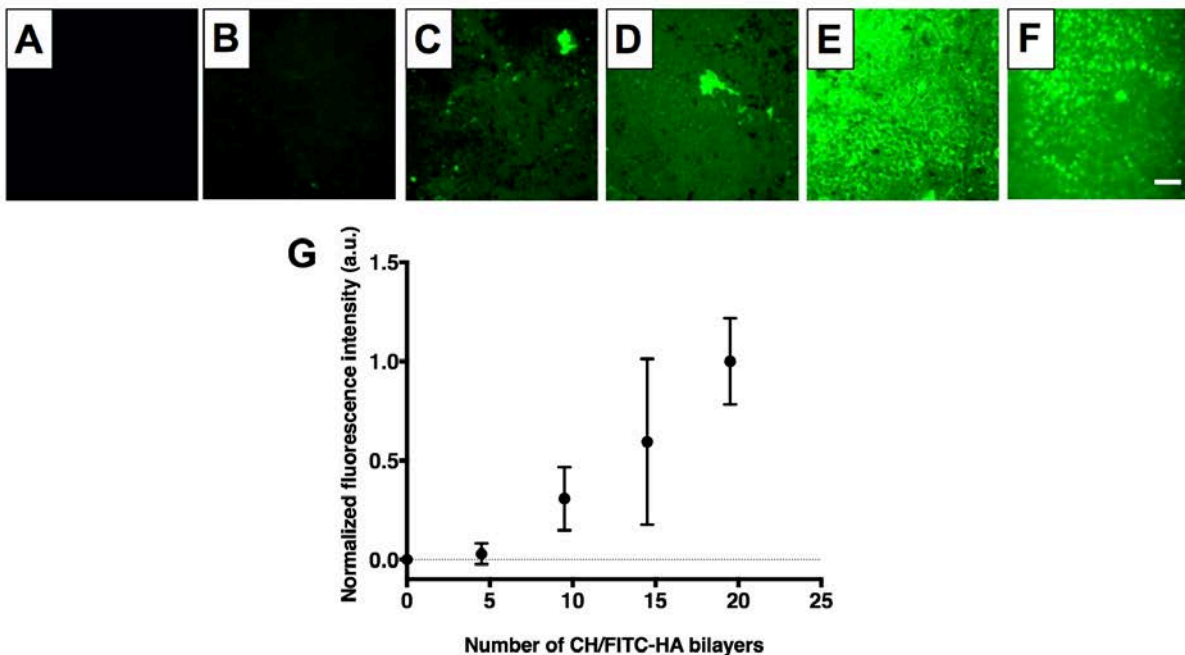

**Figure 2:** CH/HA film deposition on titanium substrates. A-E) Representative epifluorescence images of (CH/FITC-HA)<sub>x</sub> coated titanium substrates; where x= 0 (A), 4.5 (B), 9.5 (C), 14.5 (D), 19.5 (E). (F) Representative epifluorescence image of (CH/FITC-HA)<sub>19.5</sub> film deposited on titanium after EDC/NHS cross-linking. G) Growth profile of crosslinked CH/HA films. Fluorescence intensity was quantified using Fiji Image J. Data points are the average mean values and error bars are the standard deviation of at least three regions of each titanium substrate corresponding to three independent experiments, normalized to the fluorescence intensity of 19.5 CH/FITC-HA bilayers. Scale bar: 260  $\mu$ m.

392  
393 We then characterized the ability of MC3T3-E1 preosteoblast cells to attach and proliferate on  
394 CH/HA film-coated titanium substrates over a period of 6 days. Visual inspection of cell attachment  
395 and quantification of proliferation with a Cell Titer Glo assay revealed the extent of MC3T3-E1  
396 cells attachment on CH/HA film-coated titanium substrates (Figure 3 D-F, S4) was no different  
397 than on uncoated titanium (Figure 3 A-C, S4). However, proliferation over a period of 6 days on  
398 CH/HA film-coated titanium substrates (Figure 3 D-F, I, orange bars) was lower than on uncoated  
399 titanium (Figure 3 A-C, I, blue bars), suggesting that the surfaces of the film-coated substrates were  
400 less favorable for supporting MC3T3-E1 cell growth than bare titanium. Cellular adhesion and  
401 proliferation on PEM-coated surfaces is known to depend upon film physical and mechanical

402 properties (e.g. Young's modulus, roughness, and degree of hydration) [55–57]. For example,  
403 previous studies have demonstrated that depositing poly(allylamine hydrochloride – poly(acrylic  
404 acid) films at a higher pH resulted in more rigid films that increased the adhesion of NR6WT  
405 fibroblasts [58]. In addition, Schneider *et. al.* demonstrated that chemical crosslinking of CH/HA  
406 films increased film roughness and rigidity and enhanced the viability of attached HT29 cells [59].

407 As part of a strategy to improve MC3T3-E1 cell proliferation on our CH/HA films we  
408 chemically crosslinked the films using an EDC/NHS (400 mM EDC/100 mM NHS in 0.15 M NaCl)  
409 carbodiimide treatment in a post-fabrication step [60–62]. This carbodiimide-based crosslinking  
410 catalyzes the formation of amide bonds between the carboxylic groups of HA and the amine groups  
411 of CH, and was selected because both crosslinking agents are water soluble and carbodiimides do  
412 not remain as part of the amide linkage, but instead are converted to nontoxic, water soluble urea  
413 derivatives that can be easily removed [63,64]. Following the crosslinking of CH/HA films  
414 containing FITC-labeled HA, we characterized the films by fluorescence microscopy (Figure 2 E-  
415 F). We also included CH/HA films incubated in deionized water containing 0.15 M NaCl during  
416 the crosslinking step as an uncrosslinked control (Figure S2). Our results demonstrate that, after  
417 crosslinking, the surface remained covered by the films (Figure 2F, S2B), similar to control  
418 CH/FITC-HA films that were incubated in deionized water containing 0.15 M NaCl (Figure S2C).  
419 We confirmed CH/HA film crosslinking using polarization modulation infrared reflection-  
420 absorption spectroscopy (PM-IRRAS). Because PM-IRRAS requires a reflective surface, we  
421 deposited the CH/HA PEMs on gold-coated silicon wafers and obtained the infrared spectra of the  
422 films before and after EDC/NHS crosslinking. Inspection of the spectra revealed disappearance of  
423 the HA carbonyl group at  $1412\text{ cm}^{-1}$  after film crosslinking (Figure S3), consistent with the  
424 formation of an amide bond between CH and HA. Additionally, we observed that the crosslinked

443 films had a strong absorbance in the amide I ( $1660\text{ cm}^{-1}$ ) and amide II bands ( $1570\text{ cm}^{-1}$ ), further  
444 suggesting the successful crosslinking of the CH/HA films (Figure S3). We then compared MC3T3-  
445 E1 cell adhesion and proliferation on crosslinked and uncrosslinked films. We did not observe a  
446 significant change in MC3T3-E1 cell adhesion on the surfaces of the uncoated substrates,  
447 uncrosslinked films, and crosslinked films (Figure 3 and S4). However, CH/HA film crosslinking  
448 enhanced cell MC3T3-E1 cell proliferation over 6 days compared to uncrosslinked films, leading  
449 to a similar number of cells as the bare titanium surface (Figure 3). These results demonstrate that  
450 film crosslinking leads to coatings that can support MC3T3-E1 cell viability and proliferation,  
451 likely by modulating film rigidity, roughness, and/or degree of hydration as demonstrated in past  
452 studies [55–57,59].

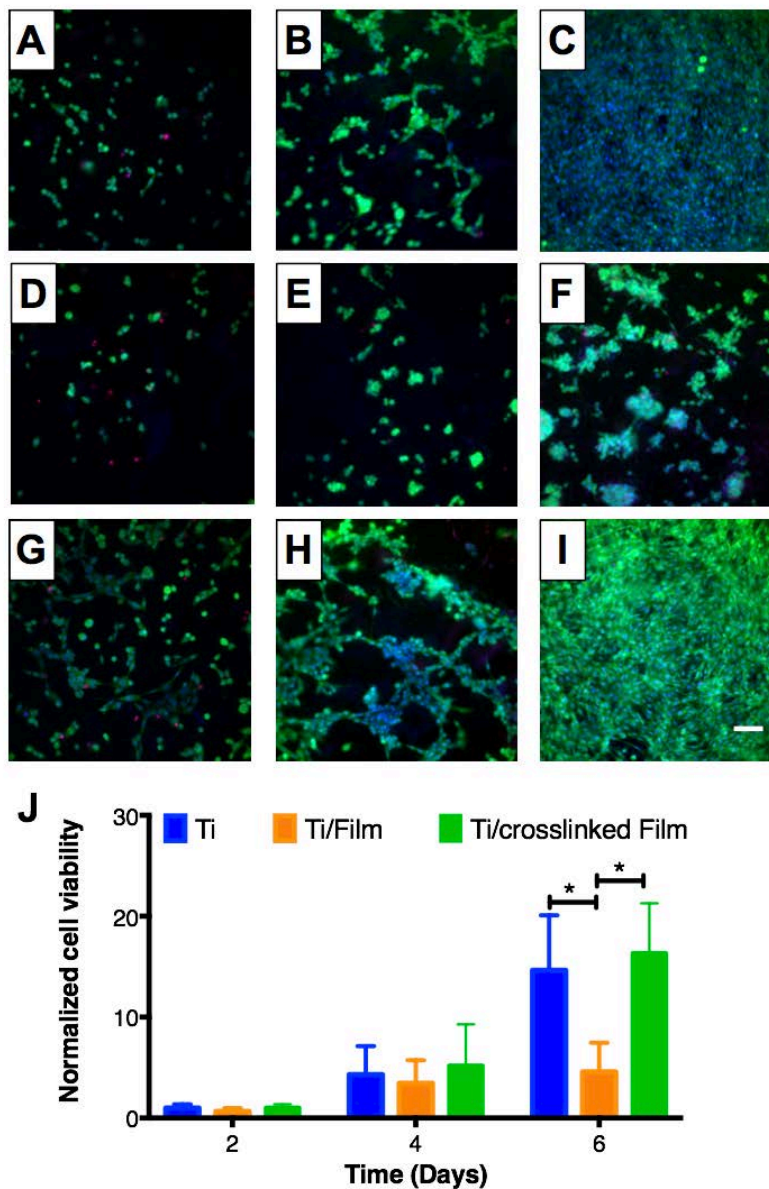

**Figure 3:** MC3T3-E1 cell attachment and proliferation on titanium substrates coated with 19.5 bilayer thick CH/HA films. A-I) Fluorescent micrographs of live cells (Calcein AM, green), dead cells (propidium iodide, red) and nuclei (Hoechst, blue) of representative fields of (A-C) uncoated, (D-F) CH/HA film-coated and (G-I) crosslinked CH/HA film-coated titanium substrates at day 2 (A, D, and G), day 4 (B, E, and H) and day 6 (C, F, and I). Scale bar: 175  $\mu\text{m}$ . J) Plot showing quantification of MC3T3-E1 cell viability using the Cell Titer Glo assay as a function of time after seeding on uncoated, CH/HA film-coated, and crosslinked CH/HA film-coated titanium substrates. MC3T3-E1 cell viability is normalized to results obtained using an uncoated control. Data points represent the mean values and error bars are the standard deviation of three independent experiments. Asterisks (\*) indicate  $p < 0.01$  by two-Way ANOVA using Tukey's multiple comparison test.

454 Following the fabrication of crosslinked CH/HA films on titanium substrates,  $\beta$ -peptide  
455 (ACHC- $\beta^3$ hVal- $\beta^3$ hLys)<sub>3</sub> was loaded into the films by incubating the films in a 0.15 M NaCl  
456 solution containing the  $\beta$ -peptide [43,46,47]. For selective bacterial biofilm prevention without  
457 toxicity to mammalian cells,  $\beta$ -peptide must elute to achieve a local concentration toxic to *S. aureus*  
458 but nontoxic to MC3T3-E1 preosteoblast cells. Therefore, we investigated the effects of varying  
459 the concentration of  $\beta$ -peptide in the loading solution on *S. aureus* and MC3T3- E1 cell viability  
460 after being cultured for 24 hr on uncoated titanium, on film-coated substrates lacking  $\beta$ -peptide,  
461 and on film-coated substrates loaded with  $\beta$ -peptide (Figure 4A). This approach of reporting  $\beta$ -  
462 peptide loading concentration was used due to difficulties associated with accurately quantifying  
463 the amount of  $\beta$ -peptide loaded into the films (e.g. by post-loading extraction). Past studies from  
464 our group have shown that varying  $\beta$ -peptide concentration in the loading solution leads to  
465 consistent and measurable differences in both the amount of  $\beta$ -peptide loaded and the release  
466 profiles of  $\beta$ -peptide from the films [43,46,65]. Our results demonstrate that the extents of *S. aureus*  
467 biofilm inhibition and toxicity toward MC3T3-E1 cells were dependent upon the concentration of  
468  $\beta$ -peptide in the loading solution (Figure 4A). A  $\beta$ -peptide loading solution concentration of 0.44  
469 mg/mL lead to coatings that completely inhibited *S. aureus* biofilm formation and maintained at  
470 least 50% survival of MC3T3-E1 cells at 24 hr (Figure 4A). Thus, this loading concentration was  
471 selected for further characterization of antimicrobial activity and biocompatibility of  $\beta$ -peptide-  
472 containing films.

473 We next investigated the kinetics of  $\beta$ -peptide release from crosslinked CH/HA films on  
474 titanium substrates by incubating uncoated titanium, films lacking  $\beta$ -peptide, and films loaded with  
475  $\beta$ -peptide in deionized water for predetermined amounts of time. Figure 4B shows the cumulative



476 release profile of  $\beta$ -peptide (ACHC- $\beta^3$ hVal- $\beta^3$ hLys)<sub>3</sub> from crosslinked films over a period of 54  
477 days. Our results reveal that  $\beta$ -peptide is released gradually at a constant rate of  $4.6 \pm 2.2$   
478  $\mu\text{g}/\text{cm}^2/\text{day}$  over a period of 28 days. Over this period, the crosslinked films released  $139.4 \pm 20.9$   
479  $\mu\text{g}/\text{cm}^2$  of  $\beta$ -peptide. The release profile reported in this study is different from previously  
480 published profiles for the release of  $\beta$ -peptide from CH/HA films fabricated on the inner lumens of  
481 catheter tube segments, which eluted approximately 350  $\mu\text{g}/\text{mL}$  of  $\beta$ -peptide over a period of 100-  
482 150 days [43,47]. We note that, for the purposes of this study achieving  $\beta$ -peptide release quantities  
483 that were selective to *S. aureus* vs MC3T3-E1 cells was a primary focus; the  $\beta$ -peptide  
484 concentration selected for loading these films was thus significantly lower than that used in our  
485 previous studies. In addition, chemical crosslinking of CH/HA films, differences in  $\beta$ -peptide  
486 sequence, the changes in underlying substrate properties and film-fabrication protocols (e.g.,  
487 immersion versus flow-based methods) could also contribute to these differences in loading and  
488 release. We note further that the release profile reported here is appropriate in the context of IFDs,  
489 because the constant rate of  $\beta$ -peptide release was tuned to achieve  $\beta$ -peptide concentrations near  
490 the *S. aureus* biofilm MIC (4  $\mu\text{g}/\text{mL}$ , Figure 1) over extended periods of time. Also, the localized  
491 release of  $\beta$ -peptide reported here is promising in the context of achieving sub-MIC drug  
492 concentrations at specific high risk sites, such as IFDs surfaces, which not only results in enhanced  
493 effectiveness against preventing *S. aureus* biofilms but also reduces the possibility of microbial  
494 cells developing  $\beta$ -peptide resistance [66]. Finally, by controlling the  $\beta$ -peptide release  
495 concentration we also reduce potential  $\beta$ -peptide toxicity against MC3T3-E1 preosteoblast cells,  
496 thereby mitigating adverse effects on osseointegration.

497 Finally, we also evaluated how the film thickness changed upon the chemical crosslinking of  
498 these films and upon  $\beta$ -peptide incorporation [43,46]. We used a focused ion beam-scanning



499 electron microscope (FIB-SEM) to generate vertical cross-section images of noncrosslinked films,  
500 crosslinked films lacking  $\beta$ -peptide, and crosslinked films loaded with  $\beta$ -peptide. Crosslinked films  
501 incubated in  $\beta$ -peptide solution had a thickness of  $705 \pm 146$  nm (Figure 4D, S1), significantly  
502 greater than crosslinked films lacking  $\beta$ -peptide ( $148 \pm 90$  nm;  $p < 0.001$ ; Figure 4C, S1). The  
503 thickness of noncrosslinked films ( $224 \pm 73$  nm) was not significantly different from the thickness  
504 of crosslinked films (Figure S1). The increase in film thickness after loading with  $\beta$ -peptide is in  
505 accordance with those of previous studies on uncrosslinked CH/HA films fabricated using other  
506 methods [43,46].

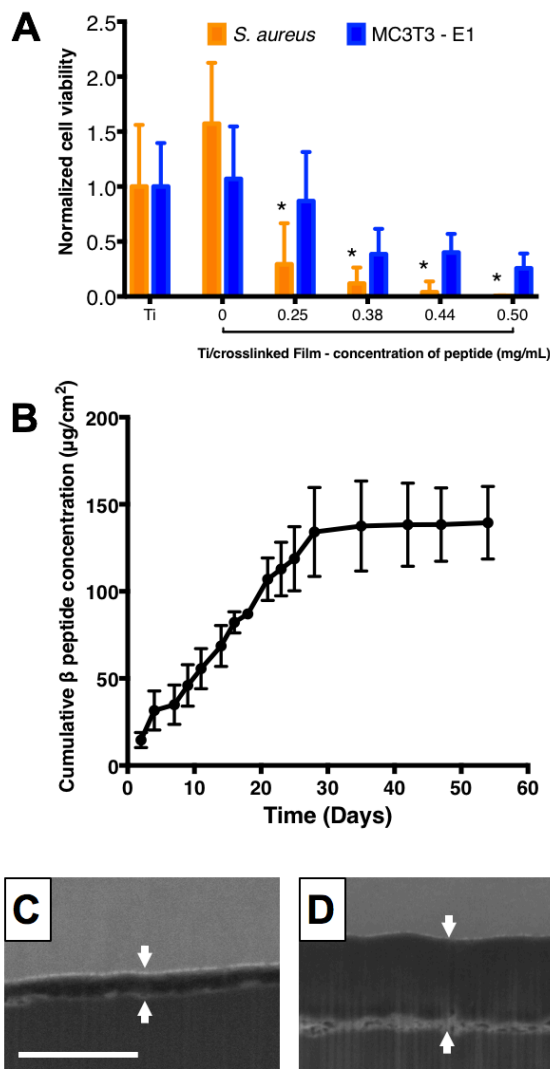

**Figure 4:**  $\beta$ -peptide loading and release from titanium substrates coated with crosslinked CH/HA films. 19.5 bilayer thick CH/HA films were deposited and crosslinked for 16 hr using an EDC/NHS solution in 0.15 M NaCl. Incorporation of  $\beta$ -peptide was performed by incubating the films for 24 hr in a  $\beta$ -peptide solution in deionized water containing 0.15M NaCl. A) Quantification of *S. aureus* and MC3T3-E1 cell viability on  $\beta$ -peptide loaded CH/HA films as a function of  $\beta$ -peptide loading concentration. After CH/HA film fabrication and  $\beta$ -peptide loading, *S. aureus* or MC3T3-E1 cells were inoculated on the films and allowed to grow for 24 hr. Viabilities were quantified using XTT and Cell Titer Glo assays, respectively. B) Plot showing the cumulative release of  $\beta$ -peptide into PBS (750  $\mu\text{L}$ ) at 37°C as a function of time.  $\beta$ -Peptide release concentrations were quantified by using the Pierce quantitative fluorometric assay, calibrated with a standard curve generated with known  $\beta$ -peptide concentrations. C-D) Representative FIB-SEM images of PEM film cross-sections c) before and D) after  $\beta$ -peptide loading. White arrows denote the film edges. Scale bar: 3  $\mu\text{m}$ . Data points represent the mean values and error bars are the standard deviation of three independent experiments.

### 508 **3.3. $\beta$ peptide-containing coatings inhibit *S. aureus* biofilms**

509 The antimicrobial activity of titanium substrates coated with  $\beta$ -peptide-containing films was  
510 characterized by incubating uncoated titanium, coatings without  $\beta$ -peptide, and coatings loaded  
511 with  $\beta$ -peptide with an inoculum of  $10^6$  *S. aureus* CFU/mL in MH medium supplemented with  
512 0.5% glucose at 37°C for 24 hr. The extent of biofilm formation was then evaluated i) qualitatively  
513 by inspecting biofilm density using the GFP-expressing *S. aureus* strain (AH1756) and SEM  
514 imaging for characterization of biofilm morphology, and ii) quantitatively by measuring biofilm  
515 metabolic activity via an XTT assay. The fluorescence micrographs in Figure 5A-C reveal that  
516 robust biofilms formed on the surfaces of uncoated titanium and film-coated titanium substrates  
517 without  $\beta$ -peptide, but that  $\beta$ -peptide-loaded films completely inhibited biofilm formation. SEM  
518 images reveal biofilms on uncoated substrates and substrates coated with control films without  $\beta$ -  
519 peptide to be composed of spherical bacterial 3D cell clusters encased by matrix (Figure 5D-E and  
520 Figure S5). In contrast, biofilm was not observed on  $\beta$ -peptide-loaded films by SEM imaging  
521 (Figure 5F and Figure S5), in accordance with the fluorescence micrographs. Finally, quantification  
522 of *S. aureus* metabolic activity (Figure 5G) confirmed a virtual elimination of biofilm on  $\beta$ -peptide-  
523 loaded coatings, compared to uncoated substrates and films lacking  $\beta$ -peptide. Overall, these  
524 results demonstrate that these  $\beta$ -peptide loaded coatings can prevent *S. aureus* biofilm formation  
525 on the surfaces of titanium substrates.

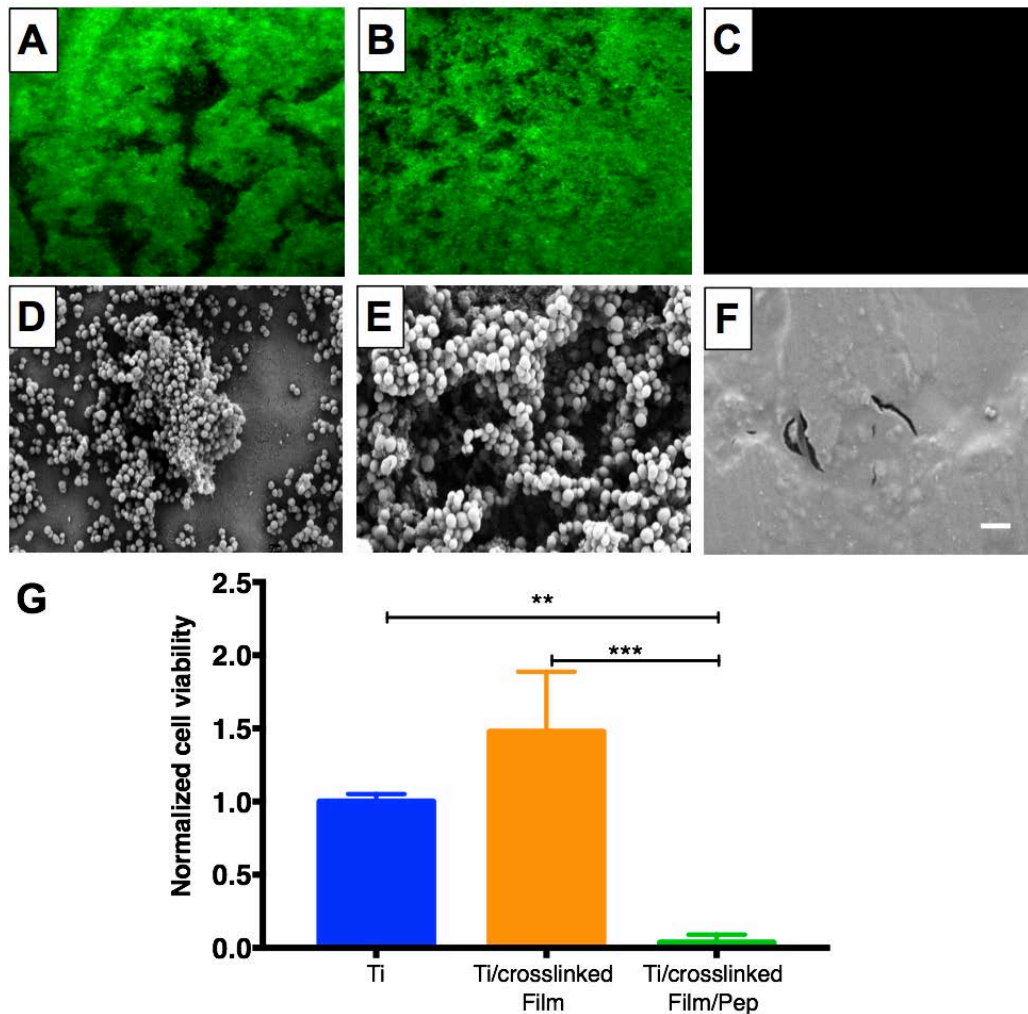

**Figure 5:** Evaluation *S. aureus* biofilm formation on titanium substrates coated with  $\beta$ -peptide-loaded CH/HA films. Uncoated, crosslinked CH/HA film-coated, and crosslinked CH/HA film-coated and  $\beta$ -peptide loaded titanium substrates were incubated for 24 hr with *S. aureus* cells ( $10^6$  CFU/mL) in biofilm inducing conditions (37°C, MH medium + 0.5% glucose). A-C) Representative fluorescence micrographs of GFP-expressing *S. aureus* strain AH1726 biofilms formed on the surfaces of A) uncoated, B) crosslinked film-coated (19.5 CH/HA bilayers) and C) crosslinked film-coated (19.5 CH/HA bilayers)  $\beta$ -peptide-loaded (0.44 mg/mL for 24 hr) titanium substrates. D-F) Representative SEM images showing the morphology of *S. aureus* biofilms formed on the surface of D) uncoated, E) crosslinked CH/HA film-coated and F)  $\beta$ -peptide-loaded crosslinked CH/HA film-coated titanium substrates. Scale bar: 10  $\mu$ m. G) Quantification of live *S. aureus* cells on uncoated, crosslinked CH/HA film-coated, and  $\beta$ -peptide-loaded crosslinked CH/HA film-coated titanium substrates. *S. aureus* cell viability was quantified using an XTT metabolic activity assay and normalized to the uncoated control. Data points represent the mean values and error bars are the standard deviation of three independent experiments. Asterisks (\*) indicate  $p < 0.01$  by two-way ANOVA using Tukey's multiple comparison test.

527        Following this proof-of-concept demonstration that  $\beta$ -peptide-containing coatings can prevent  
528 *S. aureus* biofilm formation in the short-term, we also evaluated their ability to resist *S. aureus*  
529 biofilm formation at longer time points, after some of the  $\beta$ -peptide had eluted from the films. For  
530 these experiments, we incubated titanium substrates coated with  $\beta$ -peptide-loaded films in PBS for  
531 up to 60 days, replacing the PBS solution every 2 days. At desired time points, substrates were  
532 challenged with an *S. aureus* inoculum and biofilm formation was assessed 24 hr later. Results  
533 shown in Figure 6A demonstrate that coatings loaded with  $\beta$ -peptide virtually eliminated the  
534 formation of *S. aureus* biofilms for up to 24 days after initiation of  $\beta$ -peptide elution. After 36  
535 days, we also observed significant decreases in biofilm, with about 60% less biofilm on coatings  
536 loaded with  $\beta$ -peptide compared to bare titanium (Figure 6A). This extended inhibition of biofilm  
537 formation is consistent with the gradual release of  $\beta$ -peptides from the coatings over a period of 28  
538 days (Figure 4).

539        Finally, we evaluated the ability of the  $\beta$ -peptide-loaded films to resist multiple bacterial  
540 challenges, as might occur after implantation of an orthopaedic device *in vivo*. We presented the  
541 substrates with five inocula of *S. aureus* cells for 24 hr each, washing the substrates between  
542 challenges (Figure 6B). As demonstrated in Figure 6C, the  $\beta$ -peptide-loaded coatings inhibited *S.*  
543 *aureus* biofilms after being challenged 5 times over a period of 18 days. However, the extent of  
544 biofilm inhibition was reduced for the last three challenges (~75% biofilm inhibition relative to  
545 uncoated control) compared to the first two challenges (~99% biofilm inhibition relative to  
546 uncoated control) (Figure 6C). Fluorescence micrographs of the biofilms formed on the surfaces of  
547 uncoated titanium surfaces, coatings lacking  $\beta$ -peptide, and coatings loaded with  $\beta$ -peptide  
548 confirmed the quantitative results reported in Figure 6C. Fluorescence micrographs acquired during  
549 the first two challenges demonstrate complete inhibition of *S. aureus* biofilms (Figure S6G and H)

550 compared to uncoated substrates and control films lacking  $\beta$ -peptide (Figure S6A-B, D-E).  
551 However, following the fifth challenge we did not observe complete inhibition of biofilms on  $\beta$ -  
552 peptide-loaded coatings. In this instance, we observed the formation of less robust biofilms on  $\beta$ -  
553 peptide-loaded films (Figure S6I) as compared to uncoated titanium and control films lacking  $\beta$ -  
554 peptide (Figure S6C and F).

555

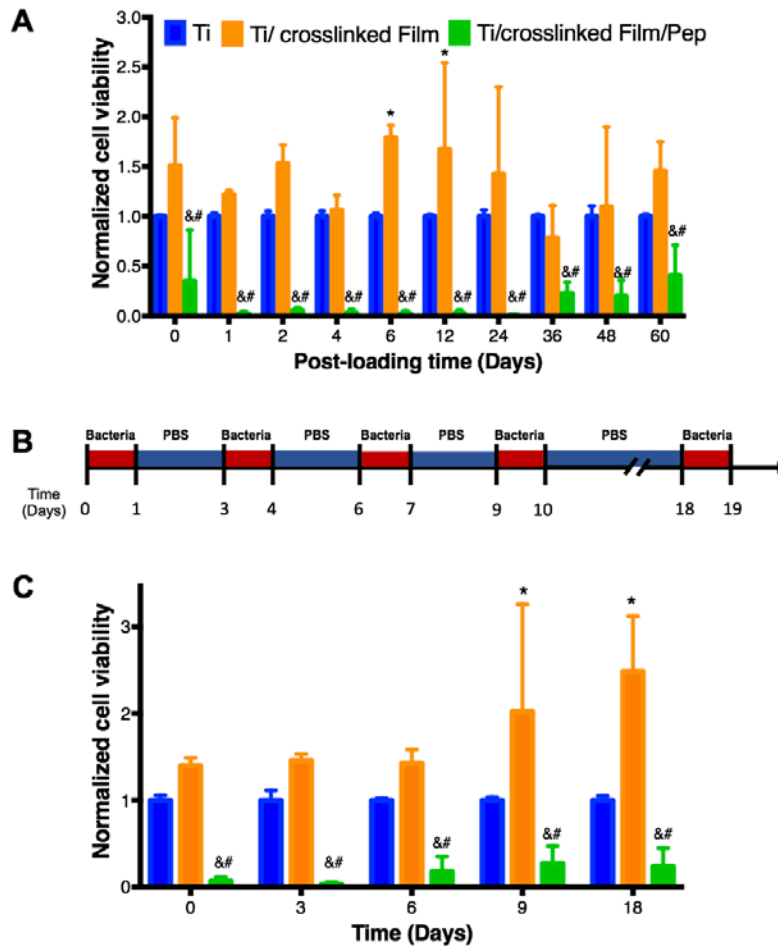

**Figure 6:** Quantification of *S. aureus* biofilm inhibition by  $\beta$ -peptide-loaded CH/HA films on titanium substrates after  $\beta$ -peptide elution in PBS for extended time and multiple short-term challenges. Uncoated, crosslinked film-coated (19.5 CH/HA bilayers), and crosslinked film-coated (19.5 CH/HA bilayers) and  $\beta$ -peptide loaded (0.44 mg/mL for 24 hr) titanium substrates were incubated for 24 hr with *S. aureus* cells ( $10^6$  CFU/mL) in biofilm inducing conditions (37°C, MH medium + 0.5% glucose). A) Long-term antimicrobial activity of uncoated, crosslinked film-coated and crosslinked film-coated  $\beta$ -peptide-loaded titanium substrates after being pre-incubated in PBS and challenged with *S. aureus*. B) Schematic for the protocol used when performing multiple *S. aureus* challenge experiments. Uncoated, crosslinked film-coated, and crosslinked film-coated and  $\beta$ -peptide loaded titanium substrates were challenged with an *S. aureus* inoculum for 24 hrs, followed by incubation in PBS for the specified period of time. These challenges were repeated until a total of 5 different challenges was performed. C) Antimicrobial activity of uncoated, film-coated, and  $\beta$  peptide post-loaded titanium substrates after multiple challenges with *S. aureus* inoculum. *S. aureus* cell viability was quantified using an XTT metabolic activity assay and normalized to the uncoated control. Data points represent the mean values and error bars are the standard deviation of three independent experiments. Asterisks (\*) indicate  $p \leq 0.05$  between Ti and Ti/crosslinked film, # indicates  $p \leq 0.05$  between Ti and Ti/crosslinked film/Pep, and & indicates  $p < 0.01$  between Ti/crosslinked film and Ti/crosslinked film/Pep by two-way ANOVA using Tukey's multiple comparison test.

556 In summary, the results presented here suggest that crosslinked CH/HA films loaded with an  
557 antimicrobial  $\beta$ -peptide may be a promising approach for inhibiting *S. aureus* colonization and  
558 biofilm formation on titanium IFDs after implantation (Figure 5), with the ability to resist multiple  
559 *S. aureus* challenges and prevent biofilm formation for several weeks. These results may improve  
560 on the short-term antimicrobial activity of current coatings focused on titanium surface  
561 modifications for preventing *S. aureus* cell attachment [52,67,68] and demonstrate the effectiveness  
562 in preventing biofilms after eluting relevant antibiotic quantities in short time-periods (e.g., hours  
563 to days only) [22,52,54,69]. Additionally, our results demonstrate inhibition of *S. aureus* biofilms  
564 in a time frame (e.g., 3 months after surgical implantation) at which patients are most susceptible  
565 to microbial colonization. Therefore, our proposed therapeutic approach could potentially improve  
566 healing and further prevent implant failure in healthcare settings [15].

567

#### 568 **3.4. $\beta$ -peptide-containing coatings elute $\beta$ -peptide concentrations biocompatible with** 569 **MC3T3- E1 cells**

570 Many antimicrobial strategies have been reported for the prevention of implant-related  
571 bacterial infections. The adaptation of these strategies to orthopaedic implants should consider their  
572 biocompatibility with the bone microenvironment, including potential effects on bone cells  
573 [18,53,68]. Our results described above demonstrate that  $\beta$ -peptides in solution can prevent *S.*  
574 *aureus* biofilm formation with minimal toxicity against MC3T3-E1 cells. In addition, release of  
575 antimicrobial  $\beta$ -peptides from crosslinked films on titanium can prevent *S. aureus* biofilm  
576 formation. We next assessed the biocompatibility of our  $\beta$ -peptide-containing coatings incubated  
577 directly with MC3T3- E1 cells. The cytotoxicity of  $\beta$ -peptide-loaded films was evaluated by  
578 seeding MC3T3-E1 cells ( $5 \times 10^4$  cells/cm<sup>2</sup>) on the surface of uncoated titanium surfaces and PEM



579 films loaded with  $\beta$ -peptide. MC3T3-E1 viability was quantified via a Cell Titer Glo assay after 24  
580 hr. Our results demonstrate that films loaded with  $\beta$ -peptide (Figure 7, green bars) supported a  
581 similar extent of attachment of MC3T3-E1 cells after 24 hr compared to uncoated titanium (Figure  
582 7, blue bars), suggesting that they are non-toxic to preosteoblast cells and exhibit good  
583 biocompatibility. Taken together with the results demonstrating *S. aureus* biofilm inhibition under  
584 these same conditions (Figure 5), these results indicate that  $\beta$ -peptide loaded films can be designed  
585 to elute  $\beta$ -peptide quantities that prevent *S. aureus* biofilms but do not cause substantial MC3T3-  
586 E1 cell toxicity.

587 We also quantified the viability of MC3T3-E1 preosteoblast cells on  $\beta$ -peptide-loaded coatings  
588 formed on titanium substrates after  $\beta$ -peptide elution in PBS for up to 60 days prior to MC3T3-E1  
589 cell seeding. The viability of the MC3T3-E1 cells on films loaded with  $\beta$ -peptide was not  
590 significantly different than viability on bare titanium (Figure 7). When taken together, these long-  
591 term MC3T3-E1 viability results (Figure 7) and the long-term biofilm inhibition prevention assay  
592 (Figure 6A) demonstrate the selectivity of films loaded with  $\beta$ -peptide for inhibiting *S. aureus*  
593 biofilms without inducing MC3T3-E1 cell toxicity for prolonged periods.

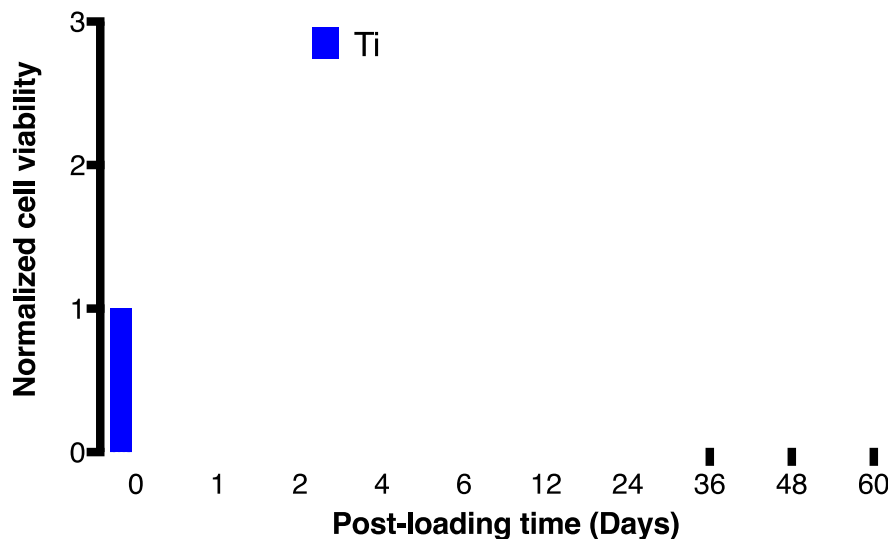

**Figure 7.** Evaluation of MC3T3-E1 cell viability on  $\beta$ -peptide-loaded CH/HA film-coated titanium substrates for extended periods of time. Uncoated, substrates and  $\beta$ -peptide-containing crosslinked CH/HA film-coated titanium substrates were incubated for 24 hr with MC3T3-E1 cells ( $5 \times 10^4$  cells/cm<sup>2</sup>). Cell viability was quantified using a Cell Titer Glo assay and normalized to uncoated control. Data points represent the mean values and error bars are the standard deviation of three independent experiments. No significant differences were found between Ti and Ti/crosslinked film/Pep by two-way ANOVA using Tukey's multiple comparison test.

594

#### 595 4. Conclusions

596 This study used a layer-by-layer based approach to fabricate crosslinked CH/HA PEM  
597 films on titanium substrates. These films supported MC3T3-E1 preosteoblast cell attachment and  
598 proliferation for up to 6 days. We also demonstrated the incorporation of an antimicrobial  $\beta$ -  
599 peptide within the crosslinked CH/HA films to yield coatings that release  $\beta$ -peptide over a period  
600 of 28 days, which is relevant in the context of inhibiting bacterial attachment and biofilm formation  
601 over short to medium-term time periods. Furthermore, we showed that films loaded with  $\beta$ -peptide  
602 successfully prevented *S. aureus* biofilms formation *in vitro* without significantly decreasing  
603 MC3T3-E1 viability, suggesting promise for these films in the context of developing orthopaedic  
604 implant surfaces that resist biofilm formation. This result suggests promise toward developing

605 novel strategies to inhibit biofilms without interfering with the osseointegration of IFDs.  
606 Moreover,  $\beta$ -peptide-loaded coatings inhibited *S. aureus* biofilm formation for up to 24 days and  
607 resisted five separate bacterial challenges over 18 days.

608 From this proof-of-concept demonstration, we conclude that crosslinked CH/HA PEM films  
609 loaded with an antimicrobial  $\beta$ -peptide are a novel and promising approach for inhibiting bacterial  
610 biofilms on IFDs and potentially reducing the occurrence of implant-associated infections in  
611 patients receiving IFDs. These promising results motivate further work to evaluate the ability of  
612  $\beta$ -peptide-loaded films to inhibit *S. aureus* biofilm-related bone infections *in vivo*, as well as the  
613 development of more complex coatings (e.g., dual-delivery of antimicrobials and bone growth  
614 factors) that could also improve osseointegration. The coatings and strategies reported here also  
615 have the potential to be useful for inhibiting microbial colonization on the surfaces of other medical  
616 devices to potentially reduce the incidence of device-related infection in other contexts.

617

## 618 **5. Acknowledgements**

619 This work was supported by the National Institutes of Health grants 1R01 AI092225 and R21  
620 AI127442 to S.P.P. and D.M.L. A. de L.R.L. was partially supported by an AOF research  
621 scholarship from the Graduate Engineering Research Scholars at UW-Madison. The authors  
622 gratefully acknowledge the use of facilities and instrumentation supported by the National Science  
623 Foundation through the University of Wisconsin Materials Research Science and Engineering  
624 Center (DMR-1121288). We thank Richard Noll for SEM training and help with FIB-SEM  
625 imaging. We also thank Benjamín J. Ortiz for his help with the PM-IRRAS film characterization  
626 and for many helpful discussions. Finally, we thank Prof. Alexander Horswill at University of  
627 Colorado for providing the GFP-expressing *S. aureus* strain (AH1756).

628 A. de L.R.L. and R.W. conducted experiments and collected data. M.R.L. synthesized and  
629 characterized the  $\beta$ -peptide. A. de L.R.L., D.M.L, and S.P.P. contributed to experimental design,  
630 data analysis and interpretation, and wrote the paper.

631

## 632 **6. References**

- 633 [1] S.B. Goodman, Z. Yao, M. Keeney, F. Yang, The future of biologic coatings for  
634 orthopaedic implants, *Biomaterials*. 34 (2013) 3174–3183.
- 635 [2] M. Geetha, A.K. Singh, R. Asokamani, A.K. Gogia, Ti based biomaterials, the ultimate  
636 choice for orthopaedic implants – A review, *Prog. Mater. Sci.* 54 (2009) 397–425.
- 637 [3] L. Montanaro, P. Speziale, G. Campoccia, S. Ravaioli, I. Cangini, G. Pietrocola, S.  
638 Giannini, C.R. Arciola, Scenery of Staphylococcus implant infections in orthopedics,  
639 *Future Microbiol.* 6 (2011) 1329–1349.
- 640 [4] T.F. Moriarty, U. Schlegel, S. Perren, R.G. Richards, Infection in fracture fixation: Can  
641 we influence infection rates through implant design?, *J. Mater. Sci. Mater. Med.* 21 (2010)  
642 1031–1035.
- 643 [5] L. Damiani, M.G. Eales, A.H. Nobbs, B. Su, P.M. Tsimbouri, M. Salmeron-Sanchez, M.J.  
644 Dalby, Impact of surface topography and coating on osteogenesis and bacterial attachment  
645 on titanium implants, *J. Tissue Eng.* 9 (2018) 1–16.
- 646 [6] C.L. Romanò, S. Scarponi, E. Gallazzi, D. Romanò, L. Drago, Antibacterial coating of  
647 implants in orthopaedics and trauma: a classification proposal in an evolving panorama, *J.*  
648 *Orthop. Surg. Res.* 10 (2015) 157.
- 649 [7] M. Ribeiro, F.J. Monteiro, M.P. Ferraz, Infection of orthopedic implants with emphasis on  
650 bacterial adhesion process and techniques used in studying bacterial-material interactions.,  
651 *Biomater.* 2 (2012) 176–194.
- 652 [8] W. Zimmerli, Clinical presentation and treatment of orthopaedic implant-associated  
653 infection, *J. Intern. Med.* 276 (2014) 111–119. doi:10.1111/joim.12233.
- 654 [9] L.G. Harris, R.G. Richards, Staphylococci and implant surfaces : a review, *Injury.* 37  
655 (2006) 3–14.
- 656 [10] W. Zimmerli, A. Trampuz, P.E. Ochsner, Prosthetic-joint infections, *N Engl J Med.* 351  
657 (2004) 1645–1654.
- 658 [11] E. Moran, I. Byren, B.L. Atkins, The diagnosis and management of prosthetic joint  
659 infections, *J. Antimicrob. Chemother.* 65 (2010) iii45-54.
- 660 [12] M.E. Olson, A.R. Horswill, Staphylococcus aureus osteomyelitis: bad to the bone., *Cell*  
661 *Host Microbe.* 13 (2013) 629–631.
- 662 [13] J. Lora-Tamayo, O. Murillo, J.A. Iribarren, A. Soriano, M. Sánchez-Somolinos, J.M.  
663 Baraia-Etxaburu, A. Rico, J. Palomino, D. Rodríguez-Pardo, J.P. Horcajada, N. Benito, A.

- 664 Bahamonde, A. Granados, M.D. Del Toro, J. Cobo, M. Riera, A. Ramos, A. Jover-Sáenz,  
665 J. Ariza, A large multicenter study of methicillin-susceptible and methicillin-resistant  
666 staphylococcus aureus prosthetic joint infections managed with implant retention, Clin.  
667 Infect. Dis. 56 (2013) 182–194.
- 668 [14] P. Stoodley, G.D. Ehrlich, P.P. Sedghizadeh, L. Hall-Stoodley, M.E. Baratz, D.T. Altman,  
669 N.G. Sotereanos, J.W. Costerton, P. Demeo, Orthopaedic biofilm infections., Curr.  
670 Orthop. Pract. 22 (2011) 558–563.
- 671 [15] J. Raphael, M. Holodniy, S.B. Goodman, S.C. Heilshorn, Multifunctional coatings to  
672 simultaneously promote osseointegration and prevent infection of orthopaedic implants.,  
673 Biomaterials. 84 (2016) 301–314.
- 674 [16] B.N. Kim, E.S. Kim, M.-D. Oh, Oral antibiotic treatment of staphylococcal bone and joint  
675 infections in adults, J. Antimicrob. Chemother. 69 (2014) 309–322.
- 676 [17] J.M. Arduino, K.S. Kaye, S.D. Reed, S.A. Peter, D.J. Sexton, L.F. Chen, N.C. Hardy, S.Y.  
677 Tong, S.S. Smugar, V.G. Fowler, D.J. Anderson, Staphylococcus aureus infections  
678 following knee and hip prosthesis insertion procedures, Antimicrob. Resist. Infect.  
679 Control. 4 (2015) 13.
- 680 [18] J. Gallo, M. Holinka, C.S. Moucha, Antibacterial surface treatment for orthopaedic  
681 implants, Int J Mol Sci. 15 (2014) 13849–80. doi:10.3390/ijms150813849.
- 682 [19] R.O. Darouiche, Device-associated infections: a macroproblem that starts with  
683 microadherence., Clin. Infect. Dis. 33 (2001) 1567–1572.
- 684 [20] J.L. del Pozo, R. Patel, The Challenge of Treating Biofilm-associated Bacterial Infections,  
685 Clin. Pharmacol. Ther. 82 (2007) 204–209.
- 686 [21] J.C.E. Odekerken, T.J.M. Welting, J.J.C. Arts, G.H.I.M. Walenkamp, P.J. Emans, Modern  
687 Orthopaedic Implant Coatings — Their Pro’s , Con’s and Evaluation Methods, in: Intech,  
688 2013: pp. 45–73.
- 689 [22] J.S. Moskowitz, M.R. Blaisse, R.E. Samuel, H.-P. Hsu, M.B. Harris, S.D. Martin, J.C.  
690 Lee, M. Spector, P.T. Hammond, The effectiveness of the controlled release of gentamicin  
691 from polyelectrolyte multilayers in the treatment of Staphylococcus aureus infection in a  
692 rabbit bone model., Biomaterials. 31 (2010) 6019–30.
- 693 [23] C. Liu, A. Bayer, S.E. Cosgrove, R.S. Daum, S.K. Fridkin, R.J. Gorwitz, S.L. Kaplan,  
694 A.W. Karchmer, D.P. Levine, B.E. Murray, M.J. Rybak, D. a. Talan, H.F. Chambers,  
695 Clinical practice guidelines by the Infectious Diseases Society of America for the  
696 treatment of methicillin-resistant Staphylococcus aureus infections in adults and children,  
697 Clin. Infect. Dis. 52 (2011) 1–38.
- 698 [24] D.H. Dusane, D. Kyrouac, I. Petersen, L. Bushrow, J.H. Calhoun, J.F. Granger, L.S.  
699 Phieffer, P. Stoodley, Targeting intracellular *Staphylococcus aureus* to lower recurrence  
700 of orthopaedic infection, J. Orthop. Res. 36 (2017) 1086–1092. doi:10.1002/jor.23723.
- 701 [25] G. Batoni, G. Maisetta, F.L. Brancatisano, S. Esin, M. Campa, Use of Antimicrobial  
702 Peptides Against Microbial Biofilms: Advantages and Limits, Curr. Med. Chem. 18  
703 (2011) 256–279.
- 704 [26] H.W. Huang, Action of Antimicrobial Peptides : Two-State Model, Biochemistry. 39

- 705 (2000) 25–30.
- 706 [27] M. Dathe, T. Wieprecht, Structural features of helical antimicrobial peptides: Their  
707 potential to modulate activity on model membranes and biological cells, *Biochim.*  
708 *Biophys. Acta - Biomembr.* 1462 (1999) 71–87.
- 709 [28] A.J. Karlsson, W.C. Pomerantz, K.J. Neilsen, S.H. Gellman, S.P. Palecek, Effect of  
710 Sequence and Structural Properties on 14-helical  $\beta$ -peptide activity against *Candida*  
711 *albicans* Planktonic Cells and Biofilms, *ACS Chem. Biol.* 5 (2010) 333–342.
- 712 [29] T.L. Raguse, E.A. Porter, B. Weisblum, S.H. Gellman, Structure-Activity studies of 14-  
713 helical antimicrobial  $\beta$ -peptides: Probing the relationship between conformational stability  
714 and antimicrobial potency, *J. Am. Chem. Soc.* 124 (2002) 12774–12785.
- 715 [30] H.W. Huang, N.E. Charron, Understanding membrane-active antimicrobial peptides, *Q.*  
716 *Rev. Biophys.* 50 (2017) e10 1-17. doi:10.1017/S0033583517000087.
- 717 [31] M. Jackson, H.H. Mantsch, J.H. Spencer, Conformation of magainin-2 and related  
718 peptides in aqueous solution and membrane environments probed by Fourier transform  
719 infrared spectroscopy., *Biochemistry.* 31 (1992) 7289–7293.
- 720 [32] R.E.W. Hancock, H.-G. Sahl, Antimicrobial and host-defense peptides as new anti-  
721 infective therapeutic strategies., *Nat. Biotechnol.* 24 (2006) 1551–1557.
- 722 [33] M.A. Aziz, J.D. Cabral, H.J.L. Brooks, S.C. Moratti, L.R. Hanton, Antimicrobial  
723 properties of a chitosan dextran-based hydrogel for surgical use, *Antimicrob. Agents*  
724 *Chemother.* 56 (2012) 280–287.
- 725 [34] K.A. Brogden, Antimicrobial peptides: pore formers or metabolic inhibitors in bacteria?,  
726 *Nat. Rev. Microbiol.* 3 (2005) 238–250.
- 727 [35] E.A. Porter, B. Weisblum, S.H. Gellman, Mimicry of host-defense peptides by unnatural  
728 oligomers: Antimicrobial  $\beta$ -peptides, *J. Am. Chem. Soc.* 124 (2002) 7324–7330.
- 729 [36] E.A. Porter, X. Wang, H.-S. Lee, B. Weisblum, S.H. Gellman, Non-haemolytic  $\beta$ -amino-  
730 acid oligomers, *Nature.* 404 (2000) 565–565.
- 731 [37] M.R. Lee, N. Raman, S.H. Gellman, D.M. Lynn, S.P. Palecek, Hydrophobicity and  
732 helicity regulate the antifungal activity of 14-helical  $\beta$ -peptides, *ACS Chem. Biol.* 9  
733 (2014) 1613–1621.
- 734 [38] P.I. Arvidsson, N.S. Ryder, H.M. Weiss, G. Gross, O. Kretz, R. Woessner, D. Seebach,  
735 Antibiotic and hemolytic activity of a  $\beta$ 2/ $\beta$ 3 peptide capable of folding into a 12/10-helical  
736 secondary structure, *ChemBioChem.* 4 (2003) 1345–1347.
- 737 [39] T. Godballe, L.L. Nilsson, P.D. Petersen, H. Jenssen, Antimicrobial  $\beta$ -Peptides and  $\alpha$ -  
738 Peptoids, *Chem. Biol. Drug Des.* 77 (2011) 107–116.
- 739 [40] N. Raman, M.-R. Lee, D. Lynn, S. Palecek, Antifungal activity of 14-helical  $\beta$ -peptides  
740 against planktonic cells and biofilms of *Candida* species, *Pharmaceuticals.* 8 (2015) 483–  
741 503.
- 742 [41] A.J. Karlsson, W.C. Pomerantz, B. Weisblum, S.H. Gellman, S.P. Palecek, Antifungal  
743 Activity from 14-Helical  $\beta$ -Peptides, *J. Am. Chem. Soc.* 128 (2006) 12630–12631.
- 744 [42] A.M. Peterson, C. Pilz-Allen, T. Kolesnikova, H. Möhwald, D.G. Shchukin, Growth



- 745 factor release from polyelectrolyte-coated titanium for implant applications, *ACS Appl.*  
746 *Mater. Interfaces.* 6 (2014) 1866–1871.
- 747 [43] N. Raman, K. Marchillo, M. Lee, A. de L. Rodríguez López, D.R. Andes, S.P. Palecek,  
748 D.M. Lynn, Intraluminal release of an antifungal  $\beta$ -peptide enhances the antifungal and  
749 anti-biofilm activities of multilayer-coated catheters in a rat model of venous catheter  
750 infection, *ACS Biomater. Sci. Eng.* 2 (2015) 112–121.
- 751 [44] B. Wang, T. Jin, Q. Xu, H. Liu, Z. Ye, H. Chen, Direct loading and tunable release of  
752 antibiotics from polyelectrolyte multilayers to reduce bacterial adhesion and biofilm  
753 formation, *Bioconjug. Chem.* 27 (2016) 1305–1313.
- 754 [45] R.M. Flessner, Y. Yu, D.M. Lynn, Rapid release of plasmid DNA from polyelectrolyte  
755 multilayers: a weak poly(acid) approach., *Chem. Commun.* 47 (2011) 550–552.
- 756 [46] N. Raman, M.R. Lee, S.P. Palecek, D.M. Lynn, Polymer multilayers loaded with  
757 antifungal  $\beta$ -peptides kill planktonic *Candida albicans* and reduce formation of fungal  
758 biofilms on the surfaces of flexible catheter tubes, *J. Control. Release.* 191 (2014) 54–62.
- 759 [47] N. Raman, M.-R. Lee, A. de L. Rodríguez López, S.P. Palecek, D.M. Lynn, Antifungal  
760 activity of a  $\beta$ -peptide in synthetic urine media: Toward materials-based approaches to  
761 reducing catheter-associated urinary tract fungal infections, *Acta Biomater.* 43 (2016)  
762 240–250.
- 763 [48] M.A. Wikler, F.R. Cockerill, W.A. Craig, M.N. Dudley, G.M. Eliopoulos, D.W. Hecht,  
764 J.F. Hindler, D.J. Sheehan, F.C. Tenover, J.D. Turnidge, M.P. Weinstein, B.L. Zimmer,  
765 F.M. Jane, J.M. Swenson, *Performance Standards for Antimicrobial Susceptibility*  
766 *Testing*, 2007.
- 767 [49] M.E. Buck, J. Zhang, D.M. Lynn, Layer-by-layer assembly of reactive ultrathin films  
768 mediated by click-type reactions of poly(2-alkenyl azlactone)s, *Adv. Mater.* 19 (2007)  
769 3951–3955.
- 770 [50] D. Liu, W.F. DeGrado, De novo design, synthesis, and characterization of antimicrobial  $\beta$ -  
771 peptides., *J. Am. Chem. Soc.* 123 (2001) 7553–7559.
- 772 [51] S.D. Nath, C. Abueva, B. Kim, B.T.L. Lee, Chitosan-hyaluronic acid polyelectrolyte  
773 complex scaffold crosslinked with genipin for immobilization and controlled release of  
774 BMP-2, *Carbohydr. Polym.* 115 (2015) 160–169.
- 775 [52] J. Fu, J. Ji, W. Yuan, J. Shen, Construction of anti-adhesive and antibacterial multilayer  
776 films via layer-by-layer assembly of heparin and chitosan., *Biomaterials.* 26 (2005) 6684–  
777 92.
- 778 [53] P.H. Chua, K.G. Neoh, Z. Shi, E.T. Kang, Structural stability and bioapplicability  
779 assessment of hyaluronic acid-chitosan polyelectrolyte multilayers on titanium substrates,  
780 *J. Biomed. Mater. Res. Part A.* 87 (2008) 1061–1074.
- 781 [54] P.-H. Chua, K.-G. Neoh, E.-T. Kang, W. Wang, Surface functionalization of titanium with  
782 hyaluronic acid/chitosan polyelectrolyte multilayers and RGD for promoting osteoblast  
783 functions and inhibiting bacterial adhesion, *Biomaterials.* 29 (2008) 1412–1421.
- 784 [55] T. Boudou, T. Crouzier, R. Auzély-Velty, K. Glinel, C. Picart, Internal composition versus  
785 the mechanical properties of polyelectrolyte multilayer films: the influence of chemical

- 786 cross-linking., *Langmuir*. 25 (2009) 13809–13819.
- 787 [56] L. Richert, P. Lavalle, E. Payan, X.Z. Shu, G.D. Prestwich, J.F. Stoltz, P. Schaaf, J.C.  
788 Voegel, C. Picart, Layer by Layer buildup of polysaccharide films: Physical chemistry and  
789 cellular adhesion aspects, *Langmuir*. 20 (2004) 448–458.
- 790 [57] C.J. Detzel, A.L. Larkin, P. Rajagopalan, Polyelectrolyte multilayers in tissue  
791 engineering., *Tissue Eng. Part B*. 17 (2011) 101–113.
- 792 [58] J.D. Mendelsohn, S.Y. Yang, J. Hiller, A.I. Hochbaum, M.F. Rubner, Rational design of  
793 cytophilic and cytophobic polyelectrolyte multilayer thin films, *Biomacromolecules*. 4  
794 (2003) 96–106.
- 795 [59] A. Schneider, C. Vodouhe, R. Ludovic, G. Francius, E. Le Guen, P. Schaaf, J.C. Voegel,  
796 B. Frisch, C. Picart, Multifunctional polyelectrolyte multilayer films: Combining  
797 mechanical resistance, biodegradability and bioactivity, *Biomacromolecules*. 8 (2007)  
798 139–145.
- 799 [60] L. Richert, F. Boulmedais, P. Lavalle, J. Mutterer, E. Ferreux, G. Decher, P. Schaaf, J.-C.  
800 Voegel, C. Picart, Improvement of stability and cell adhesion properties of polyelectrolyte  
801 multilayer films by chemical cross-linking., *Biomacromolecules*. 5 (2004) 284–94.
- 802 [61] L. Richert, A.J. Engler, D.E. Discher, C. Picart, Elasticity of native and cross-linked  
803 polyelectrolyte multilayer films, *Biomacromolecules*. 5 (2004) 1908–1916.
- 804 [62] A. Schneider, G. Francius, R. Obeid, P. Schwinté, J. Hemmerlé, B. Frisch, P. Schaaf, J.C.  
805 Voegel, B. Senger, C. Picart, Polyelectrolyte multilayers with a tunable young's modulus:  
806 Influence of film stiffness on cell adhesion, *Langmuir*. 22 (2006) 1193–1200.
- 807 [63] K. Tomihata, Y. Ikada, Crosslinking of hyaluronic acid with water-soluble carbodiimide,  
808 *J. Biomed. Mater. Res*. 37 (1997) 243–251.
- 809 [64] S.-N. Park, J.-C. Park, H.O. Kim, M.J. Song, H. Suh, Characterization of porous  
810 collagen/hyaluronic acid scaffold modified by 1-ethyl-3-(3-  
811 dimethylaminopropyl)carbodiimide cross-linking, *Biomaterials*. 23 (2002) 1205–1212.
- 812 [65] A.J. Karlsson, R.M. Flessner, S.H. Gellman, D.M. Lynn, S.P. Palecek, Polyelectrolyte  
813 multilayers fabricated from antifungal  $\beta$ -peptides: Design of surfaces that exhibit  
814 antifungal activity against *Candida albicans*, *Biomacromolecules*. 11 (2010) 2321–2328.
- 815 [66] A. Simchi, E. Tamjid, F. Pishbin, A.R. Boccaccini, Recent progress in inorganic and  
816 composite coatings with bactericidal capability for orthopaedic applications,  
817 *Nanomedicine Nanotechnology, Biol. Med*. 7 (2011) 22–39.
- 818 [67] A. Besinis, S.D. Hadi, H.R. Le, C. Tredwin, R.D. Handy, Antibacterial activity and  
819 biofilm inhibition by surface modified titanium alloy medical implants following  
820 application of silver, titanium dioxide and hydroxyapatite nanocoatings, *Nanotoxicology*.  
821 11 (2017) 327–338.
- 822 [68] A.L. Carvalho, A.C. Vale, M.P. Sousa, A.M. Barbosa, E. Torrado, J.F. Mano, N.M. Alves,  
823 Antibacterial bioadhesive layer-by-layer coatings for orthopedic applications, *J. Mater.*  
824 *Chem. B*. 4 (2016) 5385–5393.
- 825 [69] J. Min, K.Y. Choi, E.C. Dreaden, R.F. Padera, R.D. Braatz, M. Spector, P.T. Hammond,



826 Designer Dual Therapy Nanolayered Implant Coatings Eradicate Biofilms and Accelerate  
827 Bone Tissue Repair, ACS Nano. 10 (2016) 4441–4450.  
828
